# Supplementary material for: Smoking Cessation, Weight Change, and Risk of Parkinson's Disease: Analysis of National Cohort Data
Source: PubMed Central journal article supplement — J Clin Neurol. 2020 Jul 1;16(3):455–60. doi: 10.3988/jcn.2020.16.3.455 (PMC7354971; doi:10.3988/jcn.2020.16.3.455), 2020-07-01
Supplement: jcn-16-455-s001.pdf [file jcn-16-455-s001.pdf]

**Supplementary Table 1.** Incidence rates, HRs, and associated 95% CIs for Parkinson's disease when using a 2-year lag period

|                               | Total number | Events | Person-years | Incidence rate* | Crude HR (95% CI) | <i>p</i> | Adjusted HR <sup>†</sup> (95% CI) | <i>p</i> |
|-------------------------------|--------------|--------|--------------|-----------------|-------------------|----------|-----------------------------------|----------|
| Postcessation weight change   |              |        |              |                 |                   |          |                                   |          |
| Never smokers                 | 1,124,715    | 3,713  | 4,050,920    | 0.92            | 1                 | NA       | 1                                 | NA       |
| Quitters with BMI increase    | 50,110       | 72     | 170,124      | 0.42            | 0.46 (0.37–0.59)  | <0.0001  | 0.77 (0.61–0.98)                  | 0.0321   |
| Quitters with BMI maintenance | 149,683      | 224    | 519,455      | 0.43            | 0.47 (0.41–0.54)  | <0.0001  | 0.78 (0.68–0.90)                  | 0.0004   |
| Quitters with BMI decrease    | 16,210       | 29     | 52,562       | 0.55            | 0.61 (0.42–0.88)  | 0.0074   | 0.76 (0.53–1.10)                  | 0.1483   |
| Current smokers               | 1,463,209    | 1,543  | 5,053,830    | 0.31            | 0.33 (0.31–0.35)  | <0.0001  | 0.61 (0.57–0.65)                  | <0.0001  |
| Weight change                 |              |        |              |                 |                   |          |                                   |          |
| BMI increase                  | 298,341      | 777    | 1,019,425    | 0.76            | 1.42 (1.32–1.54)  | <0.0001  | 1.08 (1.00–1.17)                  | 0.0431   |
| BMI maintenance               | 2,181,030    | 4,155  | 7,711,477    | 0.54            | 1                 | NA       | 1                                 | NA       |
| BMI decrease                  | 324,556      | 649    | 1,115,989    | 0.58            | 1.03 (0.95–1.12)  | 0.0680   | 1.04 (0.96–1.13)                  | 0.3564   |

\*Incidence rates are expressed per 1,000 person-years, <sup>†</sup>Adjusted for age, BMI, alcohol consumption, physical activity, fasting blood glucose, total cholesterol, the presence of diabetes mellitus, and smoking status.

BMI: body mass index, CI: confidence interval, HR: hazard ratio.
